# Supplementary material for: Local Ugandan Production of Stable 0.2% Chlorhexidine Eye Drops
Source: PubMed Central journal article supplement — Transl Vis Sci Technol. 2023 Jan 27;12(1):27. doi: 10.1167/tvst.12.1.27 (PMC9896845; doi:10.1167/tvst.12.1.27), 2023-01-27
Supplement: tvst-12-1-27_s001.pdf [file tvst-12-1-27_s001.pdf]

## **SI 1 – Pilot study methods – Analysis of the stability of commercial aqueous CHX eye drops**

Commercially purchased aqueous 0.2% CHX solutions ( $C_{Aq}$ ) were either refrigerated at 4 °C or incubated at 40 °C at 70% relative humidity in quadruplet. At time intervals 0, 6 and 12 months the pH was determined and an aliquot was analysed by high performance liquid chromatography fitted with diode array detection (HPLC-DAD).

Each sample was injected onto the HPLC column, and the quantity of CHX present was measured using Thermo Scientific™ Dionex™ Ultimate™ 3000 HPLC-DAD system (ThermoFisher, Hemel Hempstead, UK) and separation achieved using a GENESIS® AQ 4 µm column (150 x 4.6 mm, Grace Materials Technologies, Cranforth, UK); eluting with ammonium formate (10 mM, pH 2.7) and acetonitrile (v/v; 60:40) flowing at 2 mL/min through the DAD set at 239 nm. The authenticity of the detected peak for CHX, at 1.56 mins, was determined by comparison of retention time, spectral extraction at 239 nm and spiking the sample with commercially available CHX. A calibration curve of CHX was generated by Chromeleon (Thermo Scientific™ Dionex™ Chromeleon™ 6.8 Chromatography Data System) using known amounts of the standard CHX injected onto the column.

## SI 2 – Chlorhexidine 0.2% production protocol

### Chlorhexidine Digluconate Eye Drops 0.2% w/v

10 mL

|            |                      |
|------------|----------------------|
| Batch No:  | Date of Manufacture: |
| Authority: | Authorisation date:  |

| Equipment Required Checklist – Tick off items as assembled |          |
|------------------------------------------------------------|----------|
| Equipment                                                  | Location |
| Water filtration assembly                                  |          |
| 1000 mL measuring cylinder                                 |          |
| Freshly distilled water, 2.5 L                             |          |
| Metal jug                                                  |          |
| 20 mL measuring cylinder                                   |          |
| Volumetric flask 2 L                                       |          |
| Volumetric flask 20 mL and 5 mL                            |          |
| Glass pipettes + fillers                                   |          |
| 10 mL measuring cylinder                                   |          |

| Formula                                |                             |                                |
|----------------------------------------|-----------------------------|--------------------------------|
| Ingredients                            | Quantity for standard batch | Quantity required if different |
| Chlorhexidine digluconate 20% solution | 20.0 mL                     |                                |
| Sodium Acetate                         | 23.198 g                    |                                |
| Acetic Acid 20%                        | 4.46 mL                     |                                |
| Sodium hydroxide 10M                   | 1.938 mL                    |                                |
| Freshly distilled water                | 2 L                         |                                |

| Precautions               |                                                                                                                           |
|---------------------------|---------------------------------------------------------------------------------------------------------------------------|
| Chlorhexidine digluconate | Irritant to soft tissues, irritates eyes, skin and respiratory surfaces. Wear gown, gloves, hat, mask and safety glasses. |
| Acetic acid               | Corrosive to tissues and flammable. Wear gown, gloves, mask and safety glasses.                                           |
| Sodium hydroxide          | Corrosive. Causes burns to tissues. Wear gown, gloves, mask and safety glasses.                                           |

| Ingredient details            |          |                  |              |             |
|-------------------------------|----------|------------------|--------------|-------------|
| Ingredient                    | Supplier | Catalogue number | Batch number | Expiry Date |
| Chlorhexidine digluconate 20% |          |                  |              |             |
| Acetic Acid 20%               |          |                  |              |             |
| Sodium acetate                |          |                  |              |             |
| Sodium hydroxide 10 M         |          |                  |              |             |

| Preparation of containers and materials |                                                 |         |          |
|-----------------------------------------|-------------------------------------------------|---------|----------|
| No.                                     | Step                                            | SOP No. | Operator |
| 1                                       | Count bottles into clean bowl                   |         |          |
| 2                                       | Wash bottles and place in sterilisation drum    | 04      |          |
| 3                                       | Autoclave drum for sterilisation                | 12      |          |
| 4                                       | Collect 2.5 L of freshly distilled water        | 03      |          |
| 5                                       | Ensure production room and equipment is clean   | 02, 05  |          |
| 6                                       | Rinse 2 L volumetric flask with distilled water |         |          |

| Preparation of buffer |                                                                                                                                         |         |          |
|-----------------------|-----------------------------------------------------------------------------------------------------------------------------------------|---------|----------|
| No.                   | Step                                                                                                                                    | SOP No. | Operator |
| 7                     | Ensure the preparation room is clear of previous batch                                                                                  |         |          |
| 8                     | Weigh 23.198 g of sodium acetate into a weigh boat                                                                                      | 06      |          |
| 9                     | Dissolve sodium acetate in 2 L of freshly distilled water in mixing beaker                                                              |         |          |
| 10                    | Add 4.46 mL of 20% acetic acid                                                                                                          | 18      |          |
| 11                    | Measure pH.<br><b>pH measured:</b>                                                                                                      | 07      |          |
| 12                    | Adjust pH to 6.75. Add 1.938 mL of 10 M NaOH in small portions to allow the pH to equilibrate before next addition.<br><b>Final pH:</b> |         |          |

| Solution preparation |                                                                                                                    |         |          |
|----------------------|--------------------------------------------------------------------------------------------------------------------|---------|----------|
| No.                  | Step                                                                                                               | SOP No. | Operator |
| 13                   | Add 1.5 L of acetate buffer to volumetric flask                                                                    |         |          |
| 14                   | Measure 20 mL of 20% chlorhexidine digluconate in 20 mL volumetric flask                                           |         |          |
| 15                   | Transfer chlorhexidine into 2 L volumetric flask, rinse 20 mL flask 3 times with buffer and transfer to 2 L flask. |         |          |
| 16                   | Fill flask to 2 L mark with sodium acetate buffer.                                                                 |         |          |
| 17                   | Place lid on flask, invert flask and shake to stir                                                                 |         |          |
| 18                   | Filter solution through glass sinter over vacuum                                                                   | 09      |          |
| 19                   | Transfer filtrate into jug                                                                                         |         |          |

| Solution Filling |                                                                                                                                                     |         |          |
|------------------|-----------------------------------------------------------------------------------------------------------------------------------------------------|---------|----------|
| No.              | Step                                                                                                                                                | SOP No. | Operator |
| 20               | Lay out bottles on clean surface                                                                                                                    |         |          |
| 21               | Fill the bottles with 10 mL solution                                                                                                                | 16      |          |
| 22               | Place the filled and capped bottles into the water bath trays. Record number of bottles filled and trays to be sterilised below and on white label. |         |          |

|    |                                        |        |  |
|----|----------------------------------------|--------|--|
|    | <b>No. of bottles filled:</b>          |        |  |
|    | <b>No. of trays for sterilisation:</b> |        |  |
| 23 | Clean all equipment used.              | 15, 17 |  |

| <b>Sterilisation</b> |                                                                      |                |                 |
|----------------------|----------------------------------------------------------------------|----------------|-----------------|
| <b>No.</b>           | <b>Step</b>                                                          | <b>SOP No.</b> | <b>Operator</b> |
| 24                   | Confirm the waterbath or autoclave is empty, safe and ready for use. |                |                 |
| 25                   | Sterilise by waterbath or autoclave                                  | 11, 12         |                 |
| 26                   | Remove the batch from the waterbath or autoclave                     | 11, 12         |                 |

| <b>Inspection</b> |                                                                                                                                                                                     |                |                 |
|-------------------|-------------------------------------------------------------------------------------------------------------------------------------------------------------------------------------|----------------|-----------------|
| <b>No.</b>        | <b>Step</b>                                                                                                                                                                         | <b>SOP No.</b> | <b>Operator</b> |
| 27                | Visually check the bottles for an particles or debris. Check lids cannot be tightened further. Check correct fill volume. Reject any bottles that do not conform to these criteria. | 13             |                 |

| <b>Labelling</b> |                                  |                |                 |
|------------------|----------------------------------|----------------|-----------------|
| <b>No.</b>       | <b>Step</b>                      | <b>SOP No.</b> | <b>Operator</b> |
| 28               | Check correct labels are correct | 14             |                 |
| 29               | Label each pass bottle.          |                |                 |
| 30               | Clean down bench.                |                |                 |

|                                                                                                                                                                     |                  |  |
|---------------------------------------------------------------------------------------------------------------------------------------------------------------------|------------------|--|
| No. of containers filled                                                                                                                                            |                  |  |
| No. of rejects                                                                                                                                                      | Leaking          |  |
|                                                                                                                                                                     | Particles/fibres |  |
|                                                                                                                                                                     | Caps             |  |
|                                                                                                                                                                     | Others           |  |
| No. Destroyed                                                                                                                                                       |                  |  |
| Certified that the above information is correct and that the batch may be passed to holding room.<br><br>.....<br><br>Batch approved for release: _____ Date: _____ |                  |  |

**SI3- HPLC chromatogram of CHX eye drops prepared in Uganda after 30 months storage at room temperature.** A and B: Compounded buffered CHX eye drops: CHX appeared at retention time 8.87 minutes and no degradation peak was observed (A), B is enlargement of CHX peak. C is control CHX sigma: CHX appeared at retention time 8.87 min. D is enlargement of control CHX peak.

**A. Compounded buffered CHX eye drops**

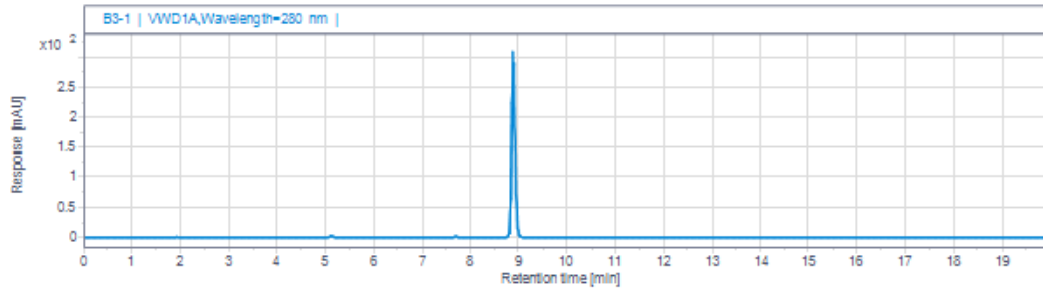

**B. Enlarged peak of compounded buffered CHX eye drops**

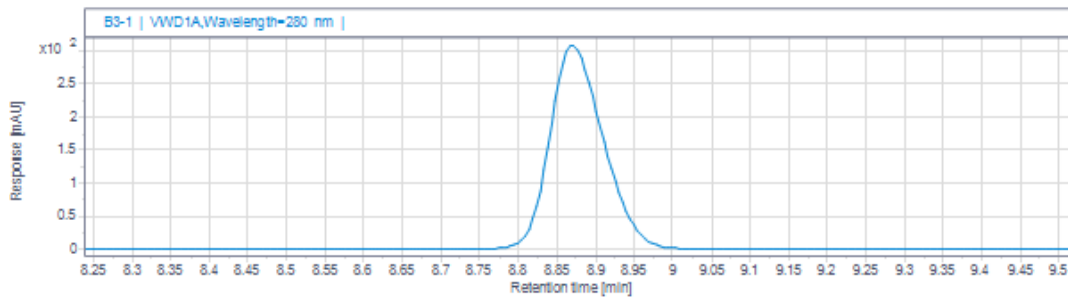

**C. Control aqueous CHX**

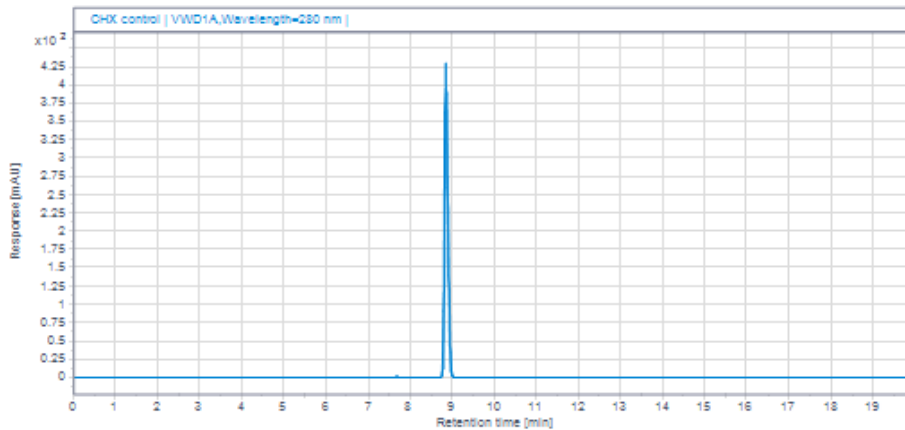

**D. Enlarged peak of aqueous control CHX**

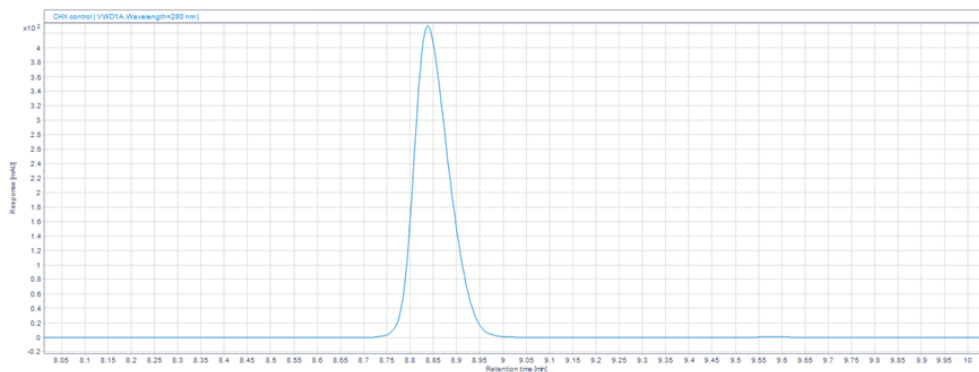

#### **SI4-References to support HPLC method**

1. A. Mohamed-Ahmed, A. Lockwood, H. Fadda, S. Madaan, P.T. Khaw, S. Brocchini, K. Karu: "LC-MS analysis to determine the biodistribution of a polymer coated ilomastat ocular implant"( J. Pharm. Biomed.Anal, 2018, 16 (157):100-106).
2. A. Mohamed-Ahmed, A. Lockwood, H. Li, M. Bailly, P.T. Khaw, S. Brocchini: "An Ilomastat-CD eye drop formulation to treat ocular scarring": (Invest. Ophthalmol. Vis. Sci, 2017, 58(9):3425-3431).

**SI 5 Glossary**

|      |                                             |
|------|---------------------------------------------|
| AcB  | Compounded buffered CHX eye drops           |
| Aq   | Compounded unbuffered aqueous CHX eye drops |
| CAq  | Unbuffered commercial aqueous CHX eye drops |
| CACB | Buffered commercial CHX eye drops           |
